# Supplementary material for: Intratumoral talimogene laherparepvec injection with concurrent preoperative radiation in patients with locally advanced soft-tissue sarcoma of the trunk and extremities: phase IB/II trial
Source: PubMed Central journal article supplement — J Immunother Cancer. 2021 Jul 30;9(7):e003119. doi: 10.1136/jitc-2021-003119 (PMC8327848; doi:10.1136/jitc-2021-003119), 2021-07-30
Supplement: jitc-2021-003119supp001.pdf [file jitc-2021-003119supp001.pdf]

## Supplementary appendix

## Cytokine analysis

| Analyte                             | BeadRegion | Standard Curve(pg/mL) | Serum | Plasma | CellCultur | Sensitivity(pg/mL) |
|-------------------------------------|------------|-----------------------|-------|--------|------------|--------------------|
| Angiopoietin-like Protein 4/ANGPTL4 | 73         | 1,804 - 438,380       | 1:02  | 1:02   | 1:02       | 86                 |
| CCL2/JE/MCP-1                       | 62         | 33-8,017              | 1:02  | 1:02   | 1:02       | 9.9                |
| CCL3/MIP-1 alpha                    | 35         | 101.2-24,580          | 1:02  | 1:02   | 1:02       | 16.2               |
| CCL4/MIP-1 beta                     | 37         | 150.2 - 36,493        | 1:02  | 1:02   | 1:02       | 5.8                |
| CCL7/MCP-3/MARC                     | 19         | 35.3 - 8,570          | 1:02  | 1:02   | 1:02       | 3.2                |
| CCL11/Eotaxin                       | 51         | 60.7 - 14,750         | 1:02  | 1:02   | 1:02       | 14.6               |
| CCL22/MDC                           | 36         | 48.8 - 11,870         | 1:02  | 1:02   | 1:02       | 8.5                |
| CD40 Ligand/TNFSF5                  | 74         | 212 - 51,430          | 1:02  | 1:02   | 1:02       | 34.7               |
| CX3CL1/Fractalkine                  | 46         | 1,114 - 270,610       | 1:02  | 1:02   | 1:02       | 64.8               |
| CXCL1/GRO alpha/KC/CINC-1           | 44         | 151 - 12,200          | 1:02  | 1:02   | 1:02       | 5.3                |
| CXCL2/GRO beta/MIP-2/CINC-3         | 27         | 49.2 - 11,960         | 1:02  | 1:02   | 1:02       | 7.86               |
| CXCL10/IP-10/CRG-2                  | 21         | 2.8 - 690             | 1:02  | 1:02   | 1:02       | 1.18               |
| EGF                                 | 25         | 18.7 - 4,550          | 1:02  | 1:02   | 1:02       | 8.9                |
| FGF basic/FGF2/bFGF                 | 47         | 1.81-440              | 1:02  | 1:02   | 1:02       | 6.5                |
| Flt-3 Ligand                        | 77         | 14.9 - 3,610          | 1:02  | 1:02   | 1:02       | 1.5                |
| G-CSF                               | 54         | 24-5,840              | 1:02  | 1:02   | 1:02       | 4.1                |
| GM-CSF                              | 66         | 12.2-2,970            | 1:02  | 1:02   | 1:02       | 4.1                |
| IFN-gamma                           | 29         | 58.5-14,209           | 1:02  | 1:02   | 1:02       | 0.4                |
| IL-1 alpha/IL-1F1                   | 38         | 5.2-1,270             | 1:02  | 1:02   | 1:02       | 0.9                |
| IL-1 beta/IL-1F2                    | 28         | 19.5-4,744            | 1:02  | 1:02   | 1:02       | 0.8                |
| IL-1ra/IL-1F3                       | 30         | 28-6,793              | 1:02  | 1:02   | 1:02       | 18                 |
| IL-2                                | 43         | 29.6-7,200            | 1:02  | 1:02   | 1:02       | 1.8                |
| IL-3                                | 15         | 84.5 - 20,530         | 1:02  | 1:02   | 1:02       | 11.6               |
| IL-4                                | 39         | 14.6-3,550            | 1:02  | 1:02   | 1:02       | 9.3                |
| IL-5                                | 53         | 6.6-1,610             | 1:02  | 1:02   | 1:02       | 0.5                |
| IL-6                                | 13         | 4.8-1,154             | 1:02  | 1:02   | 1:02       | 1.7                |
| IL-7                                | 20         | 4.5 - 1,100           | 1:02  | 1:02   | 1:02       | 0.41               |
| IL-8/CXCL8                          | 18         | 5.2-1,255             | 1:02  | 1:02   | 1:02       | 1.8                |
| IL-10                               | 22         | 4.8-1,162             | 1:02  | 1:02   | 1:02       | 1.6                |
| IL-12 p70                           | 56         | 137-33,340            | 1:02  | 1:02   | 1:02       | 20.2               |
| IL-15                               | 52         | 6.3 - 1,540           | 1:02  | 1:02   | 1:02       | 1.01               |
| IL-17/IL-17A                        | 42         | 12.8-3,110            | 1:02  | 1:02   | 1:02       | 1.8                |
| Lymphotoxin-alpha/TNF-beta          | 45         | 6.21-1,510            | 1:02  | 1:02   | 1:02       | 1.52               |
| TGF-alpha                           | 63         | 18.6 - 4,510          | 1:02  | 1:02   | 1:02       | 0.82               |
| TNF-alpha                           | 12         | 9.7-2,359             | 1:02  | 1:02   | 1:02       | 1.2                |
| VEGF                                | 26         | 8.4-2,051             | 1:02  | 1:02   | 1:02       | 2.1                |

**Table S1:** To determine serological correlates with TVEC treatment, we performed multiplexing of 36 cytokines using serum samples at five different time points from 27 patients.

|                 |                 |
|-----------------|-----------------|
| TVEC-induced    | <b>CXCL10</b>   |
|                 | <b>CX3CL1</b>   |
|                 | <i>FLT3L</i>    |
|                 | <b>IL-6</b>     |
|                 | IL-7            |
|                 | IL-17A          |
| TVEC-Suppressed | CCL11           |
|                 | EGF             |
| TVEC-NR         | <b>ANGPTL4</b>  |
|                 | <i>CCL2</i>     |
|                 | CCL3            |
|                 | CCL4            |
|                 | CCL22           |
|                 | <b>CXCL1</b>    |
|                 | CXCL2           |
|                 | CD40L           |
|                 | FGF             |
|                 | IL-1RA          |
|                 | IL-2            |
|                 | IL-8            |
|                 | <b>VEGF</b>     |
|                 | <b>TGFalpha</b> |

**Table S2:** 22 out of 36 cytokines exhibited measurable levels, among which 6 cytokines (CXCL10, CX3CL1, FLT3L, IL-6, IL-7, and IL-17A) were induced by the treatment protocol, with 2 suppressed (EGF and CCL11) and others unchanged (TVEC\_NR)

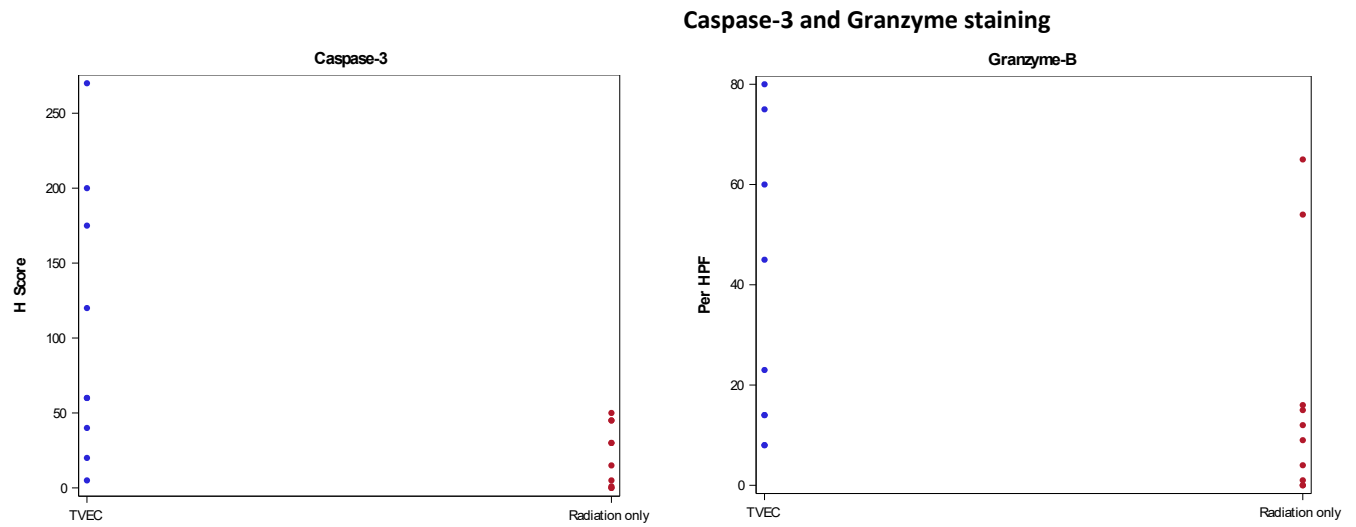

**Figure S1 (A&B):** H-score differences in Caspase 3 ( $p=0.01$ ) and Granzyme B testing ( $p=0.10$ ) between historical EBRT alone vs TVEC plus EBRT treated sarcoma tissue specimens

|            | Treatment |             |             |
|------------|-----------|-------------|-------------|
|            | EBRT only | TVEC + EBRT |             |
|            | N=10      | N=9         | P-value     |
| Caspase-3  | 22.5      | 60.0        | <b>0.01</b> |
|            | (0-50)    | (5-270)     |             |
| Granzyme B | 10.5      | 23.0        | 0.10        |
|            | (0-65)    | (8-80)      |             |

**Table S2:** H-scores between historical EBRT alone treated resected sarcoma specimens and TVEC plus EBRT treated resected tumor specimens

|                                       |                        |
|---------------------------------------|------------------------|
| UPS                                   | TVEC plus<br>Radiation |
| Myxofibrosarcoma                      |                        |
| UPS                                   |                        |
| Myxofibrosarcoma                      |                        |
| UPS                                   |                        |
| Undifferentiated spindle cell sarcoma |                        |
| Myxoid liposarcoma                    |                        |
| Pleomorphic liposarcoma               |                        |
| Myxoid liposarcoma                    |                        |
| Dedifferentiated Liposarcoma          | Radiation only         |
| Myxoid/round cell liposarcoma         |                        |
| Pleomorphic liposarcoma               |                        |
| Myxofibrosarcoma                      |                        |
| Undifferentiated spindle cell sarcoma |                        |
| UPS                                   |                        |
| UPS                                   |                        |
| Undifferentiated spindle cell         |                        |
| Myxofibrosarcoma                      |                        |
| UPS                                   |                        |
| Undifferentiated spindle cell sarcoma |                        |

**Table S3:** Histological subtypes of resected radiation only treated tumor specimens used for comparison of Caspase-3 and Granzyme B testing
